# Supplementary material for: High-resolution leaf wax carbon and hydrogen isotopic record of the late Holocene paleoclimate in arid Central Asia
Source: Copernicus journal article supplement (doi:10.5194/cp-11-619-2015), 2015-04-01
Supplement: Supplementary file 1 [file cp-11-619-2015-supplement.zip]

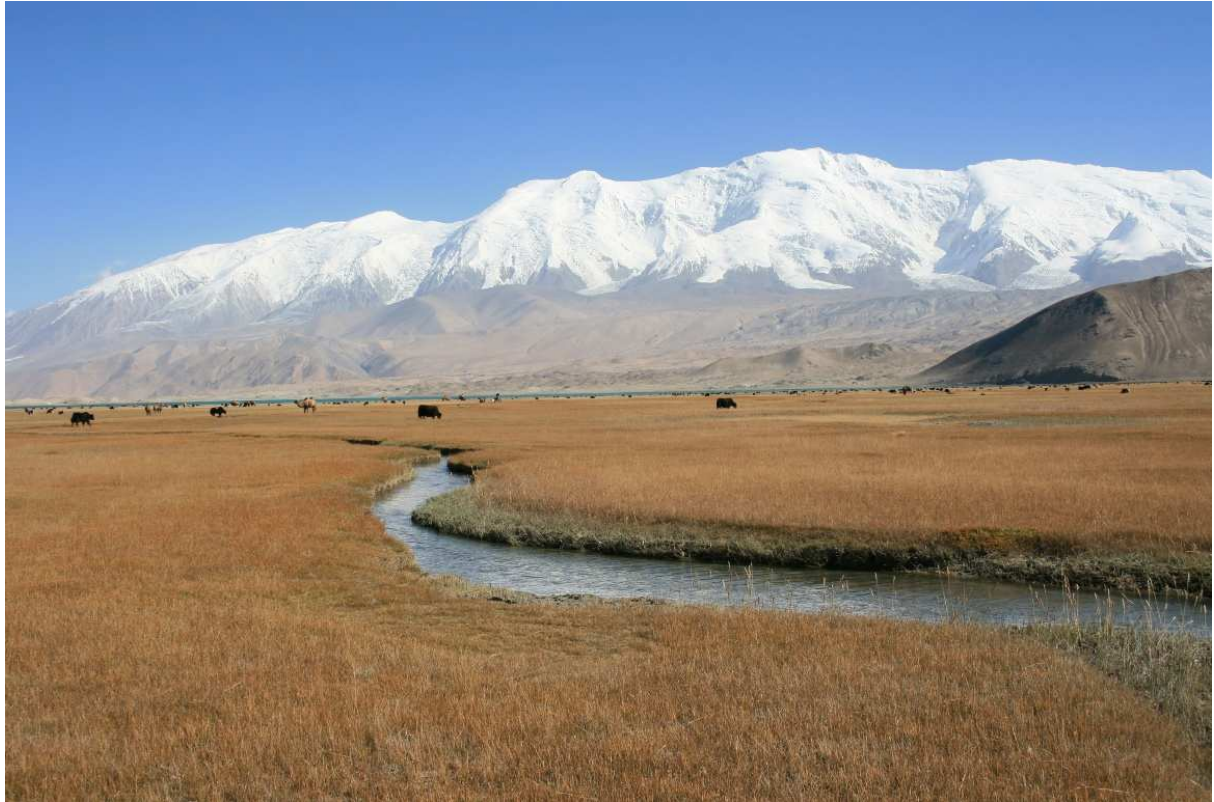

Fig S1: top: inflow of Lake Karakuli (visible in the background). Photo taken at alluvial fan south of the lake (see Fig. 1). Mt. Kongur Shan in the background. (Photo credit: Jian Ni; 20<sup>th</sup> September 2008).

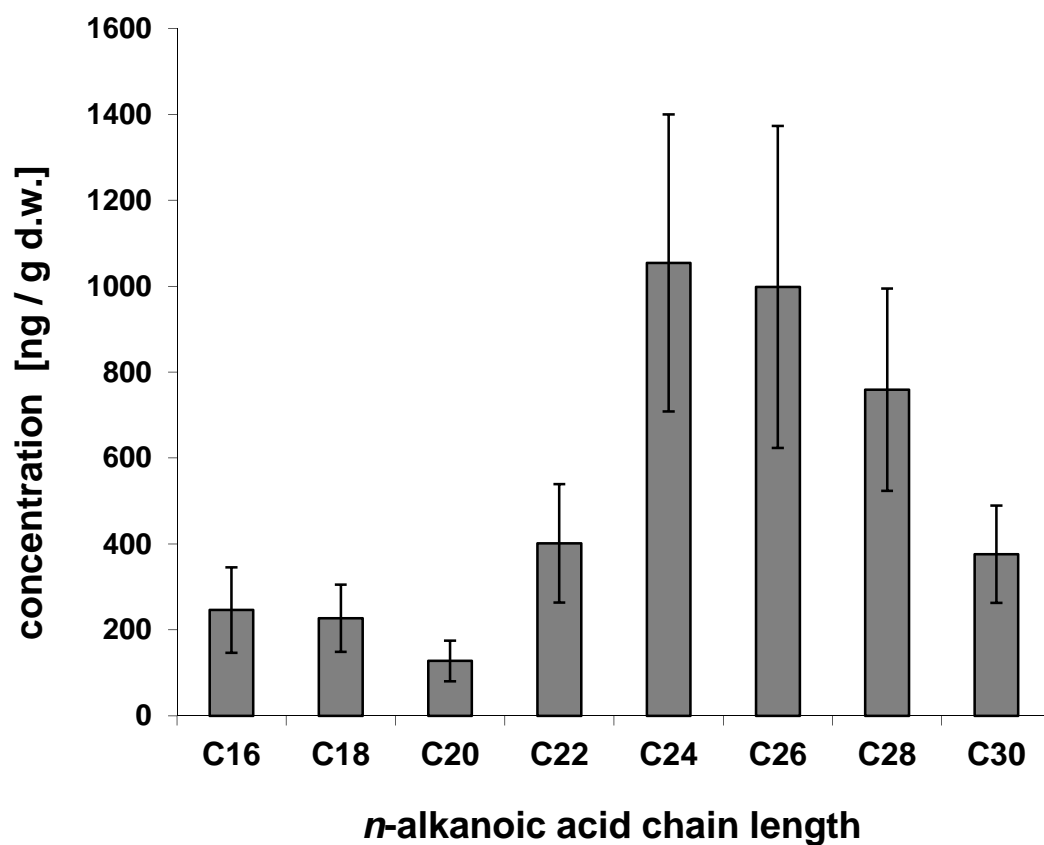

Fig. S2: Molecular abundance distribution of *n*-alkanoic acids showing mean and standard deviation (error bars) for all downcore samples ( $n = 125$ )

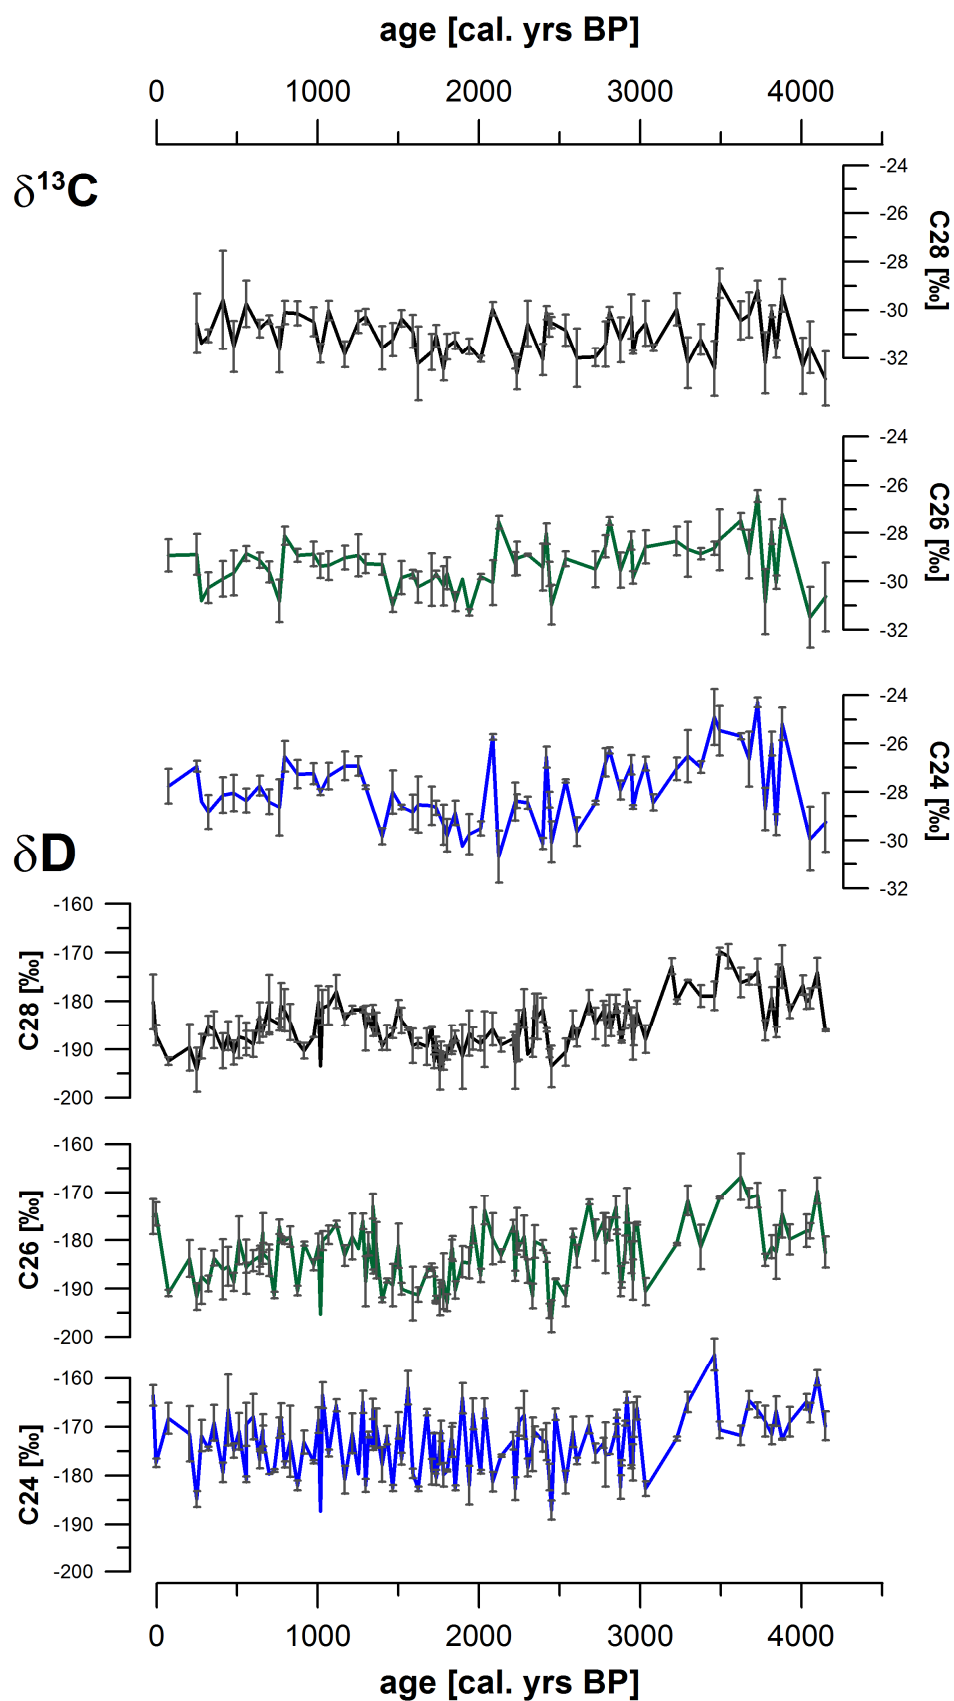

Fig S3:  $\delta\text{D}$  and  $\delta^{13}\text{C}$  values of  $\text{C}_{24}$ ,  $\text{C}_{26}$  and  $\text{C}_{28}$  n-alkanoic acids downcore. Error bars represent standard deviations of triplicate measurements.

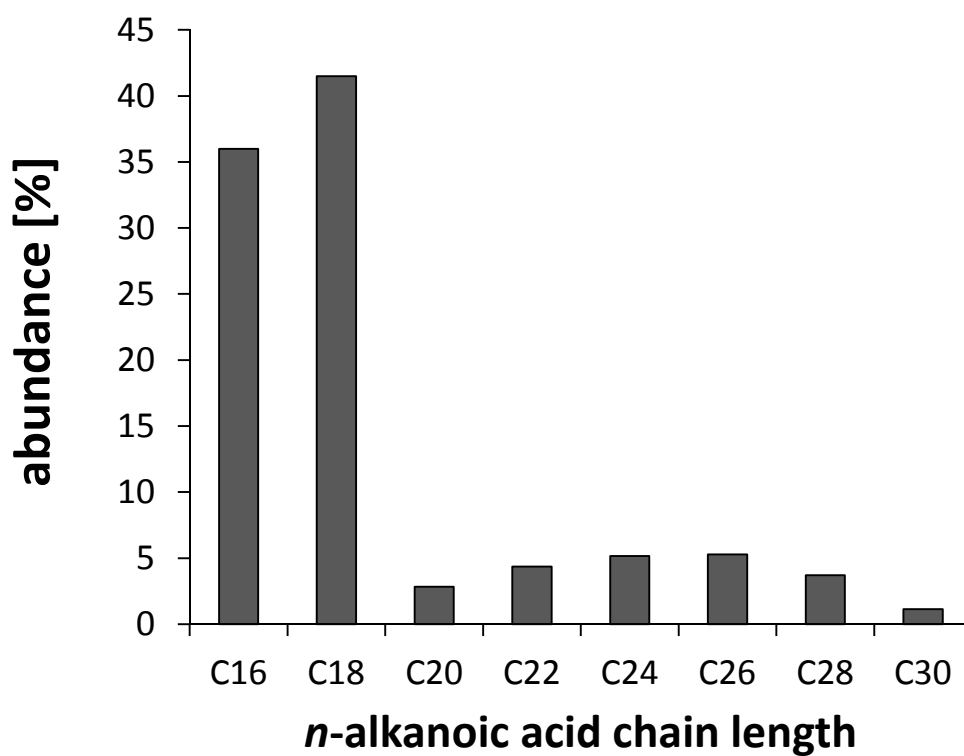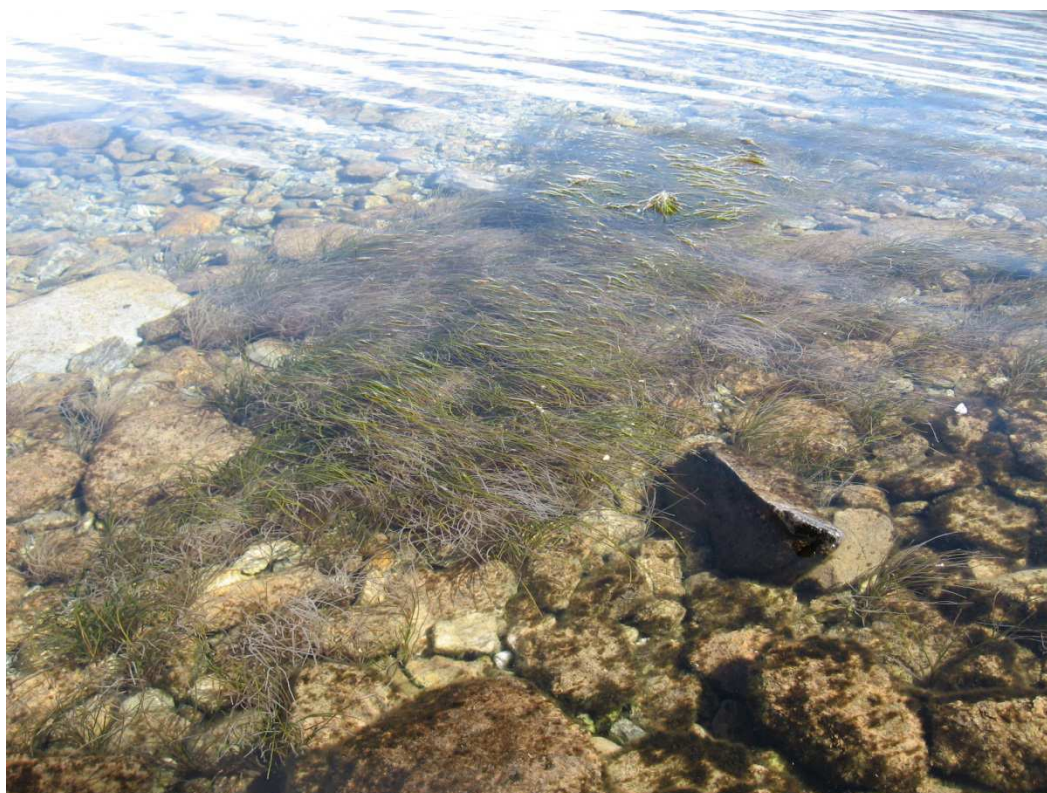

Fig S4: Top: relative abundance distribution of *n*-alkanoic acids in one submerged aquatic plant (*Potamogeton* sp.) collected close to the shore of Lake Karakuli from ca. 20cm water depth. Bottom: picture of the sampled macrophyte (Photo credit: Bernhard Aichner; 20<sup>th</sup> September 2008)

1 S5: Equation to calculate fractionation factors ( $\epsilon$ ) between source water and lipids:

2 
$$\epsilon_{\text{lipid/water}} (\text{‰}) = 1000[(\delta D_{\text{lipid}} + 1000)/(\delta D_{\text{water}} + 1000) - 1]$$

3

4

5 S6: Tables with isotopic raw data; (a)  $\delta D$ -values and (b)  $\delta^{13}C$ -values of measured *n*-alkanoic  
6 acids

7

8 S7: kml-file showing sampling sites of water samples, the coring location, and meteorological  
9 stations at Taxkorgan and Bulun Kul.
