# Supplementary material for: High-resolution leaf wax carbon and hydrogen isotopic record of the late Holocene paleoclimate in arid Central Asia
Source: Copernicus journal article supplement (doi:10.5194/cp-11-619-2015), 2015-04-01
Supplement: Supplementary file 2 [file cp-11-619-2015-supplement.zip]

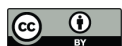

## *Supplement of*

# **High-resolution leaf wax carbon and hydrogen isotopic record of the late Holocene paleoclimate in arid Central Asia**

**B. Aichner et al.**

*Correspondence to:* B. Aichner (bernhard.aichner@gmx.de)

- cp-11-619-2015-supplement-cover-letter.pdf
- AICHNER CP 2015 locations supplement S7.kml
- AICHNER CP 2015 supplement S1-S7.pdf
- AICHNER CP 2015 supplement tables S6.xlsx
